# Supplementary material for: Endocytic inhibitors alleviate uranium-induced nephrotoxicity in HK-2 cells by reducing cellular uptake and mitigating oxidative stress and apoptosis
Source: Research Square preprint supplement (doi:10.21203/rs.3.rs-8572952/v1), 2026-02-05

Caspase 3

Number 1：

β-actin Caspase 3


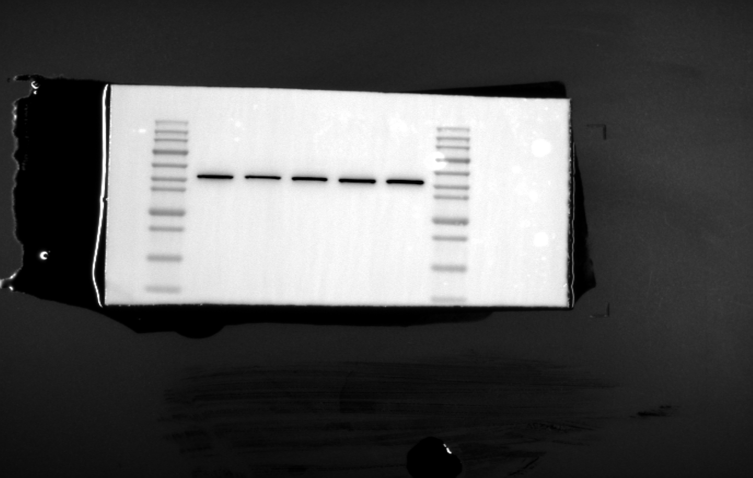

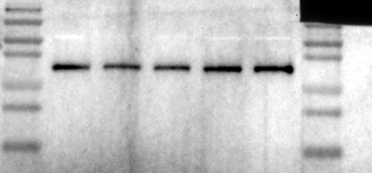


Number 2:

β-actin Caspase 3


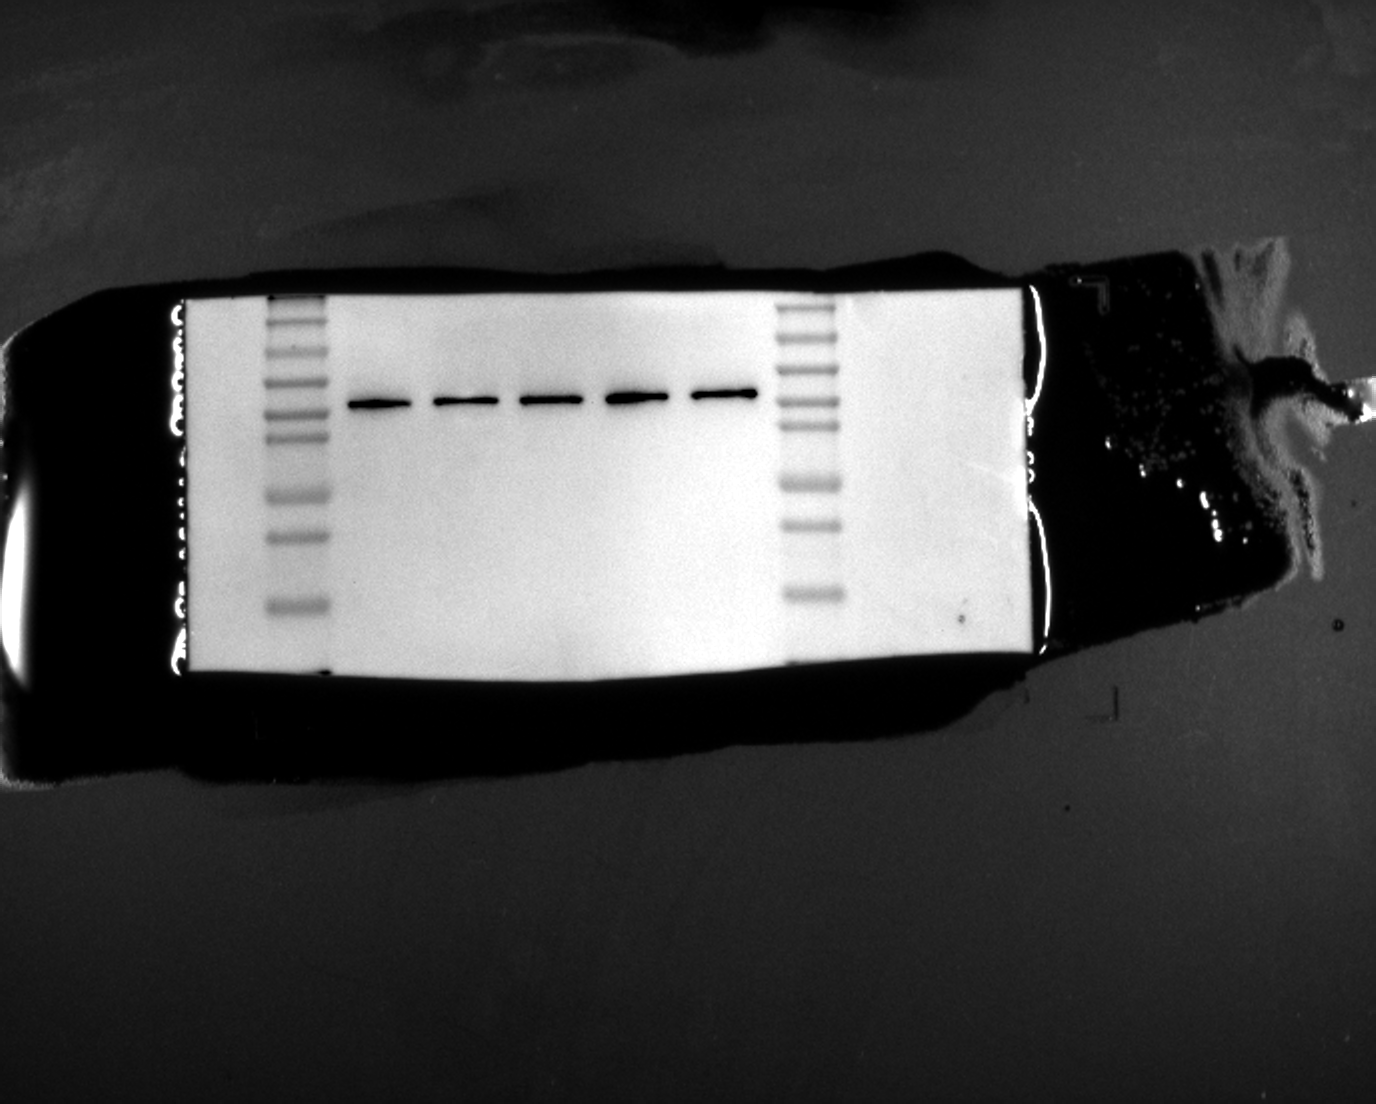

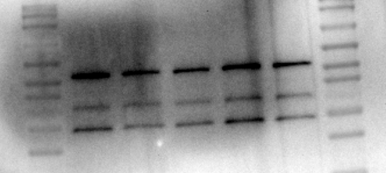


Number 3：

β-actin Caspase 3


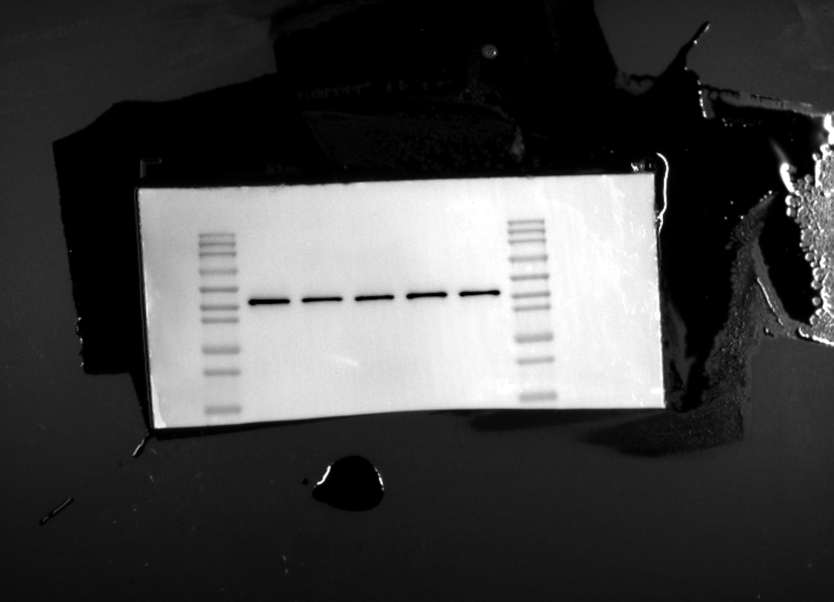

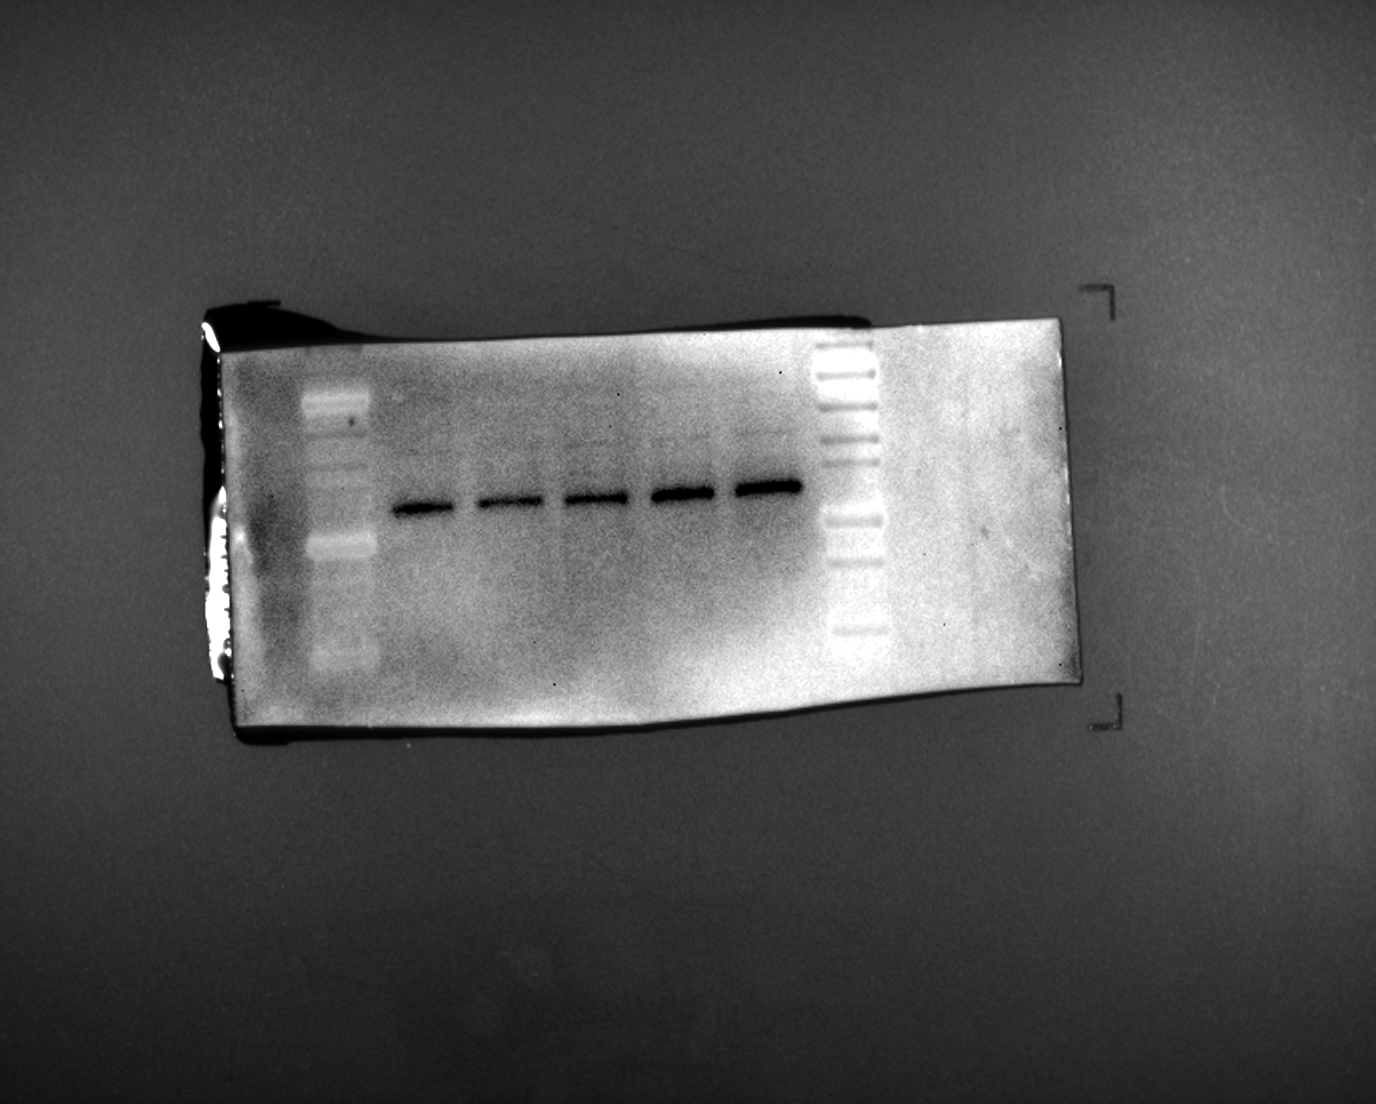


Bax

Number 1：

β-actin Bax


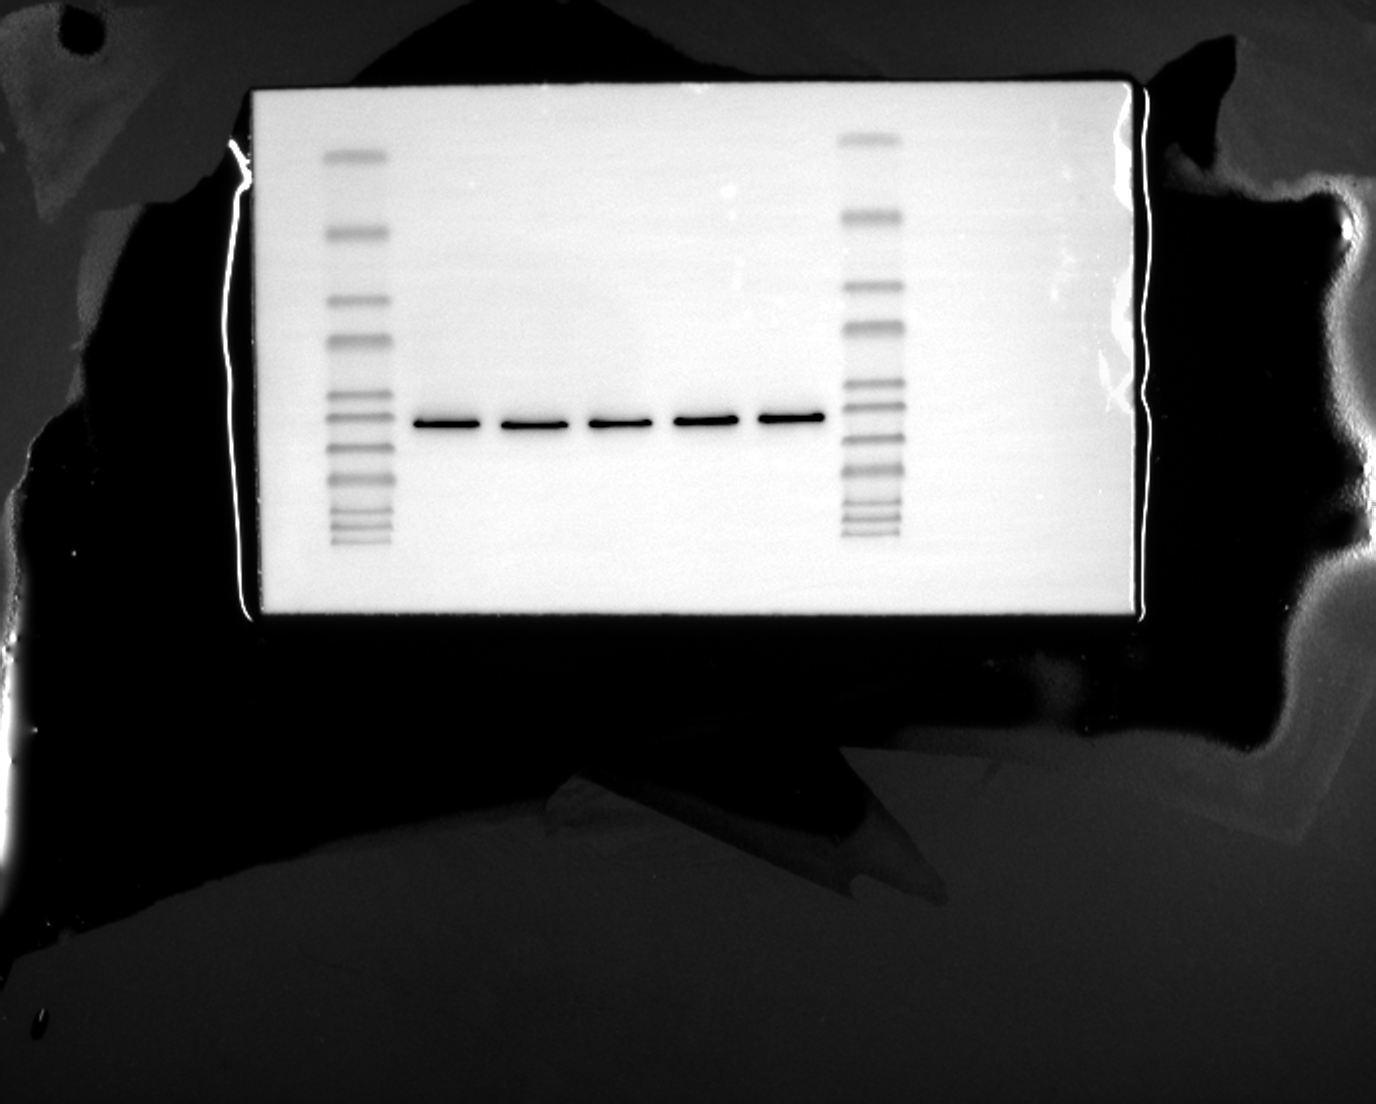

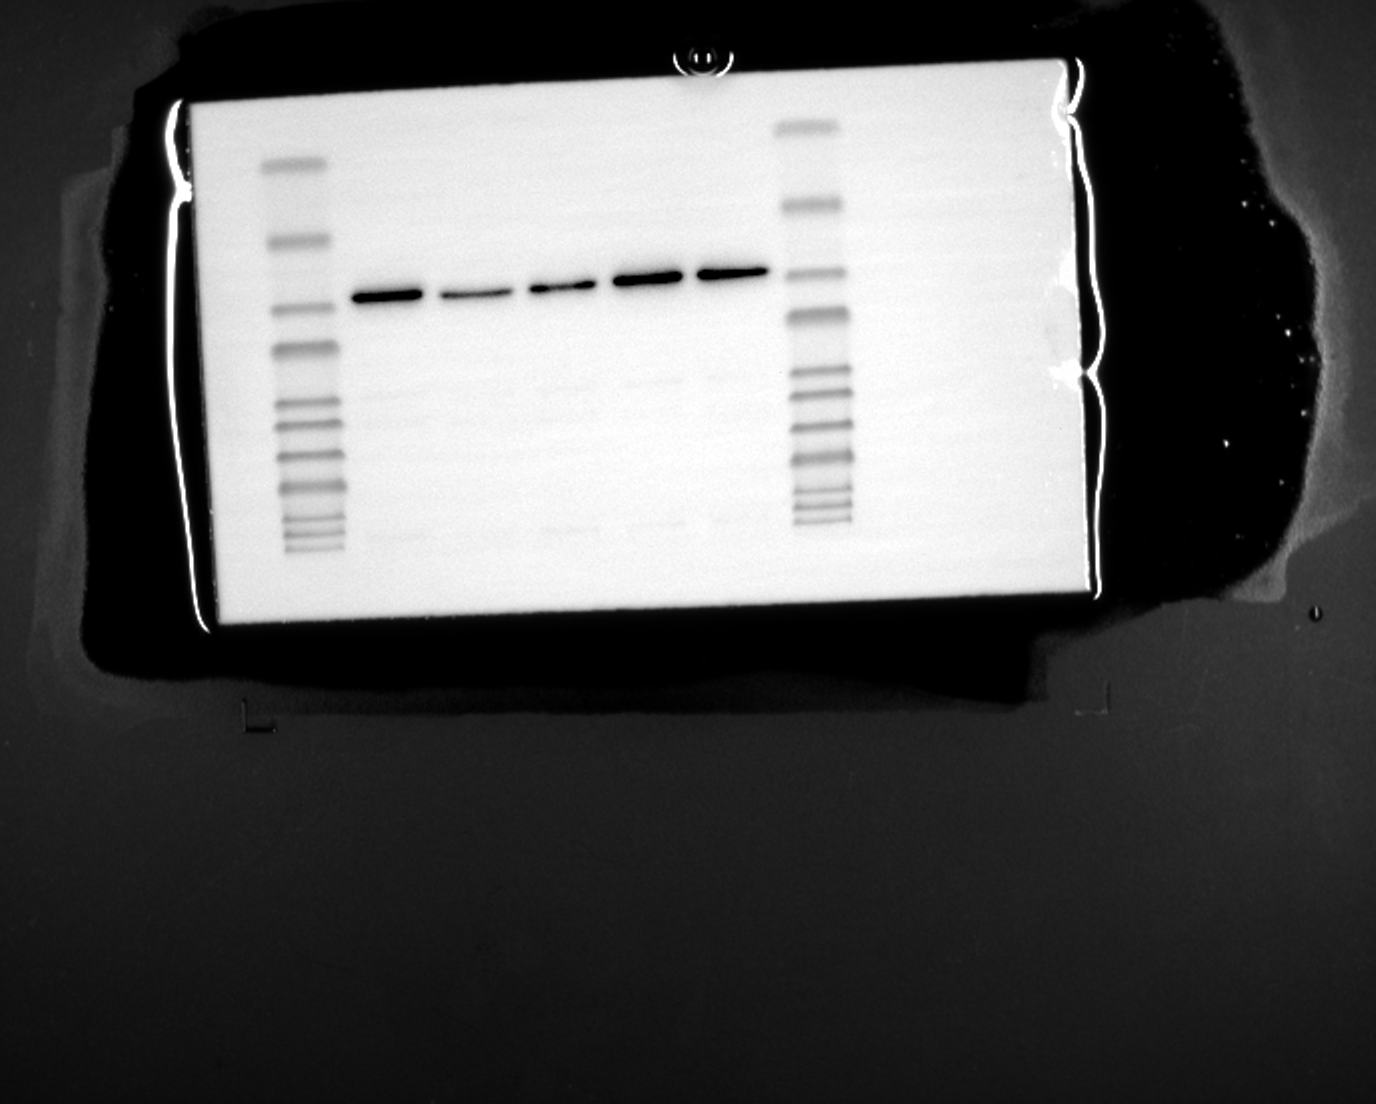


Number 2：

β-actin Bax


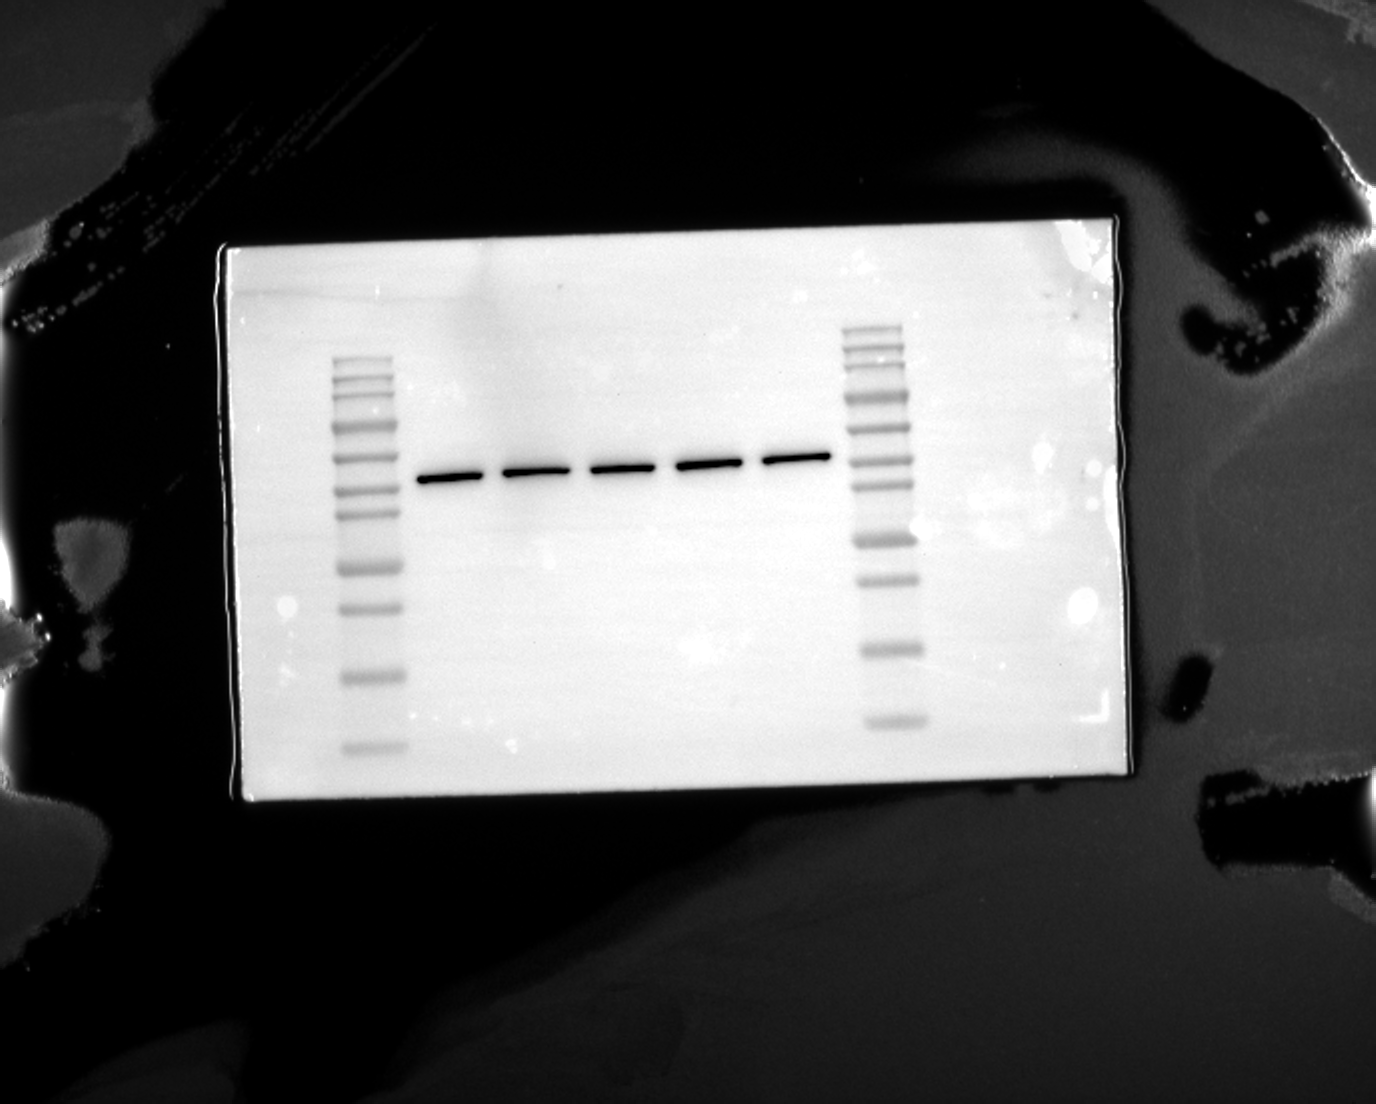

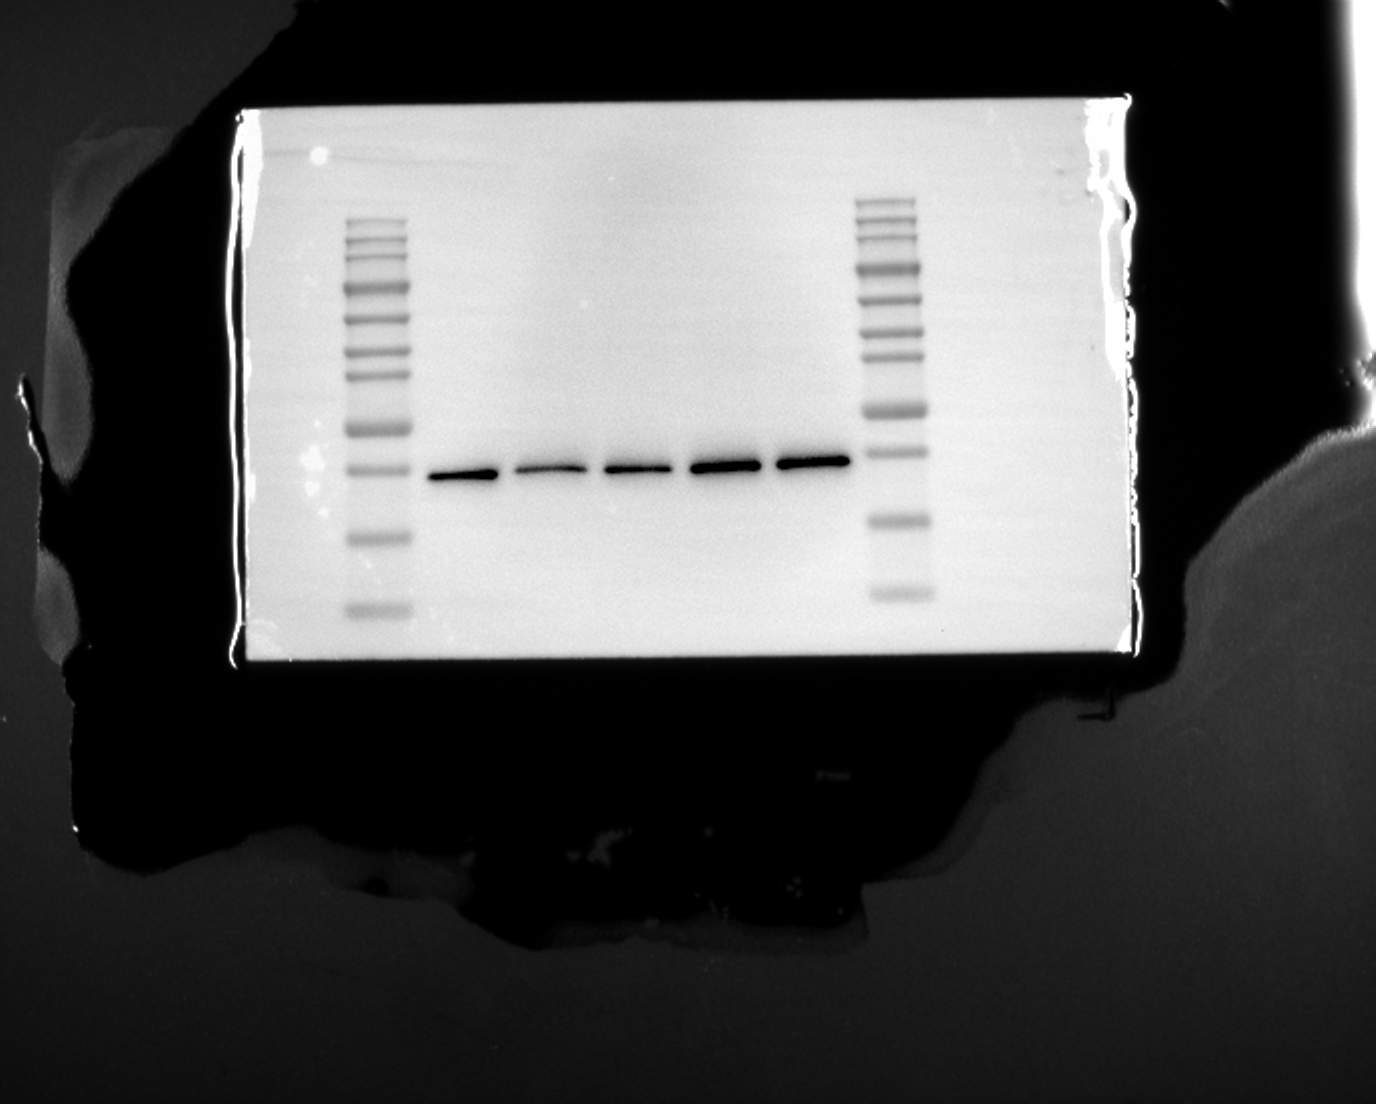


Number 3：

β-actin Bax


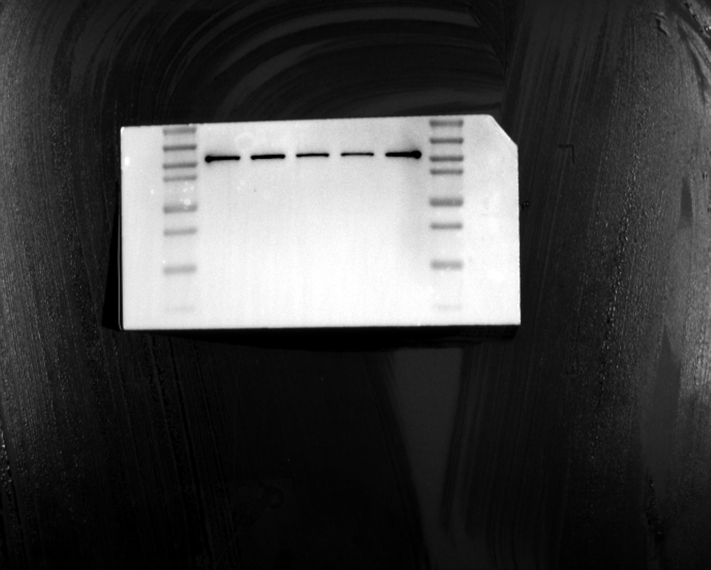

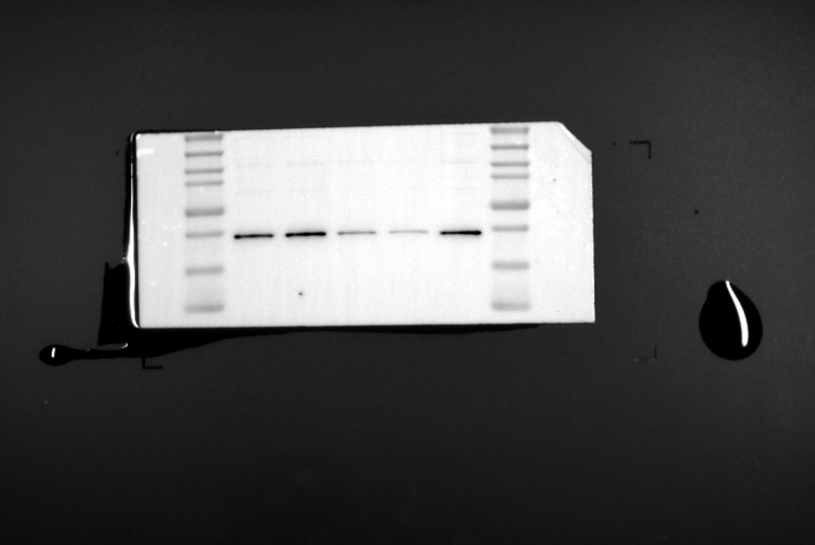


Bcl-2

Number 1：

β-actin Bcl-2


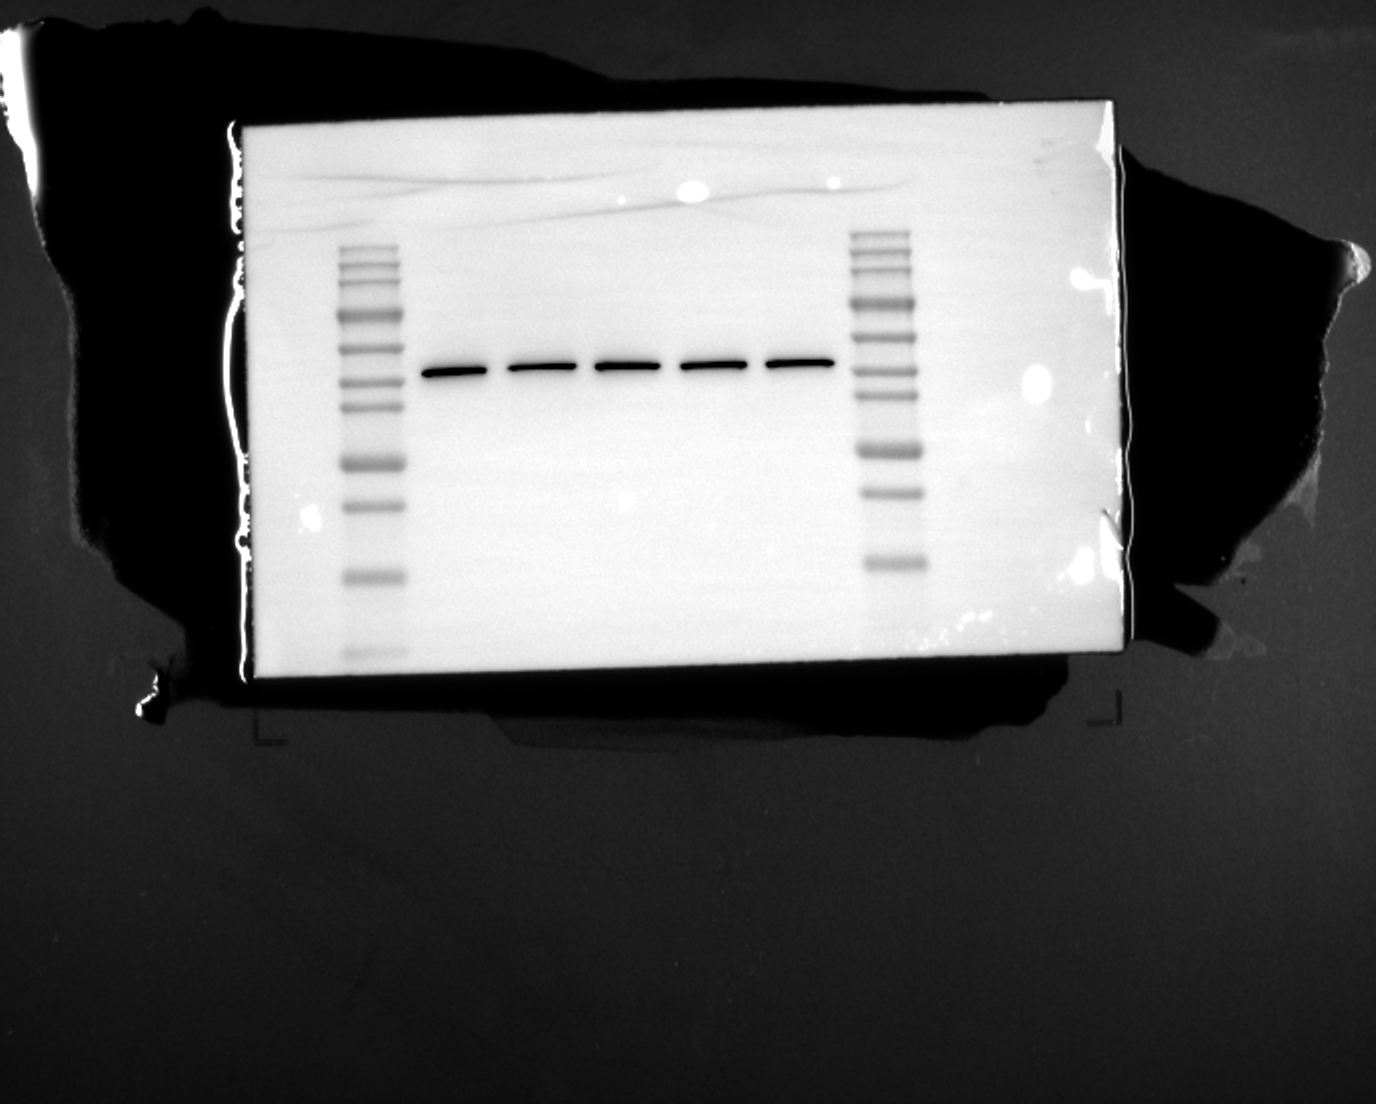

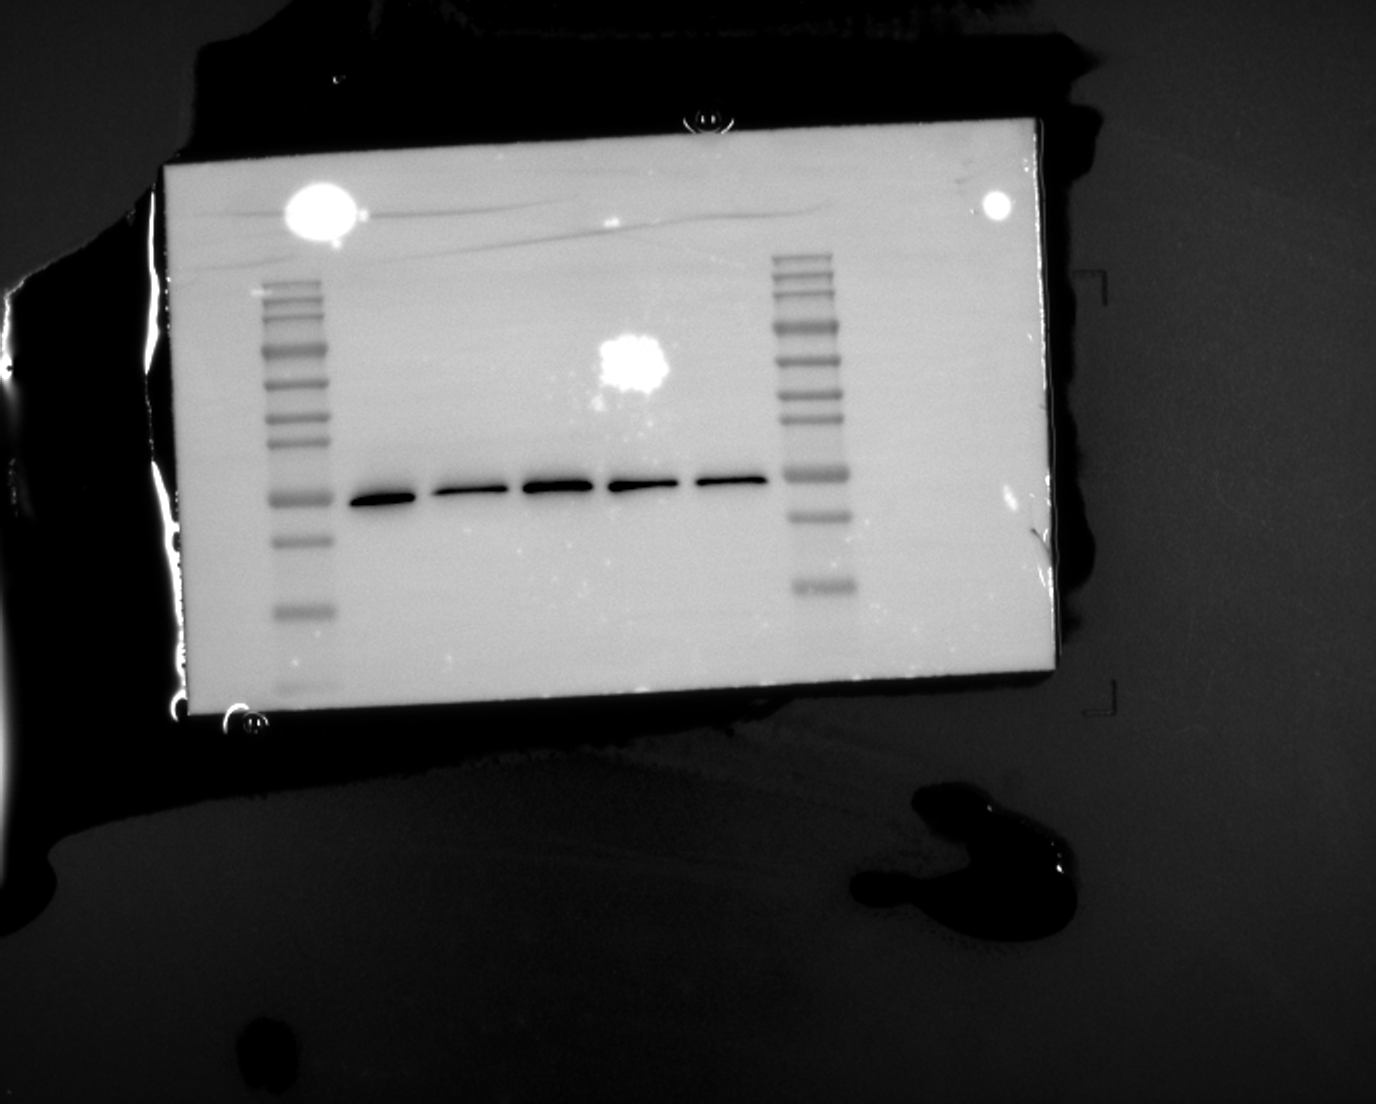


Number 2：

β-actin Bcl-2


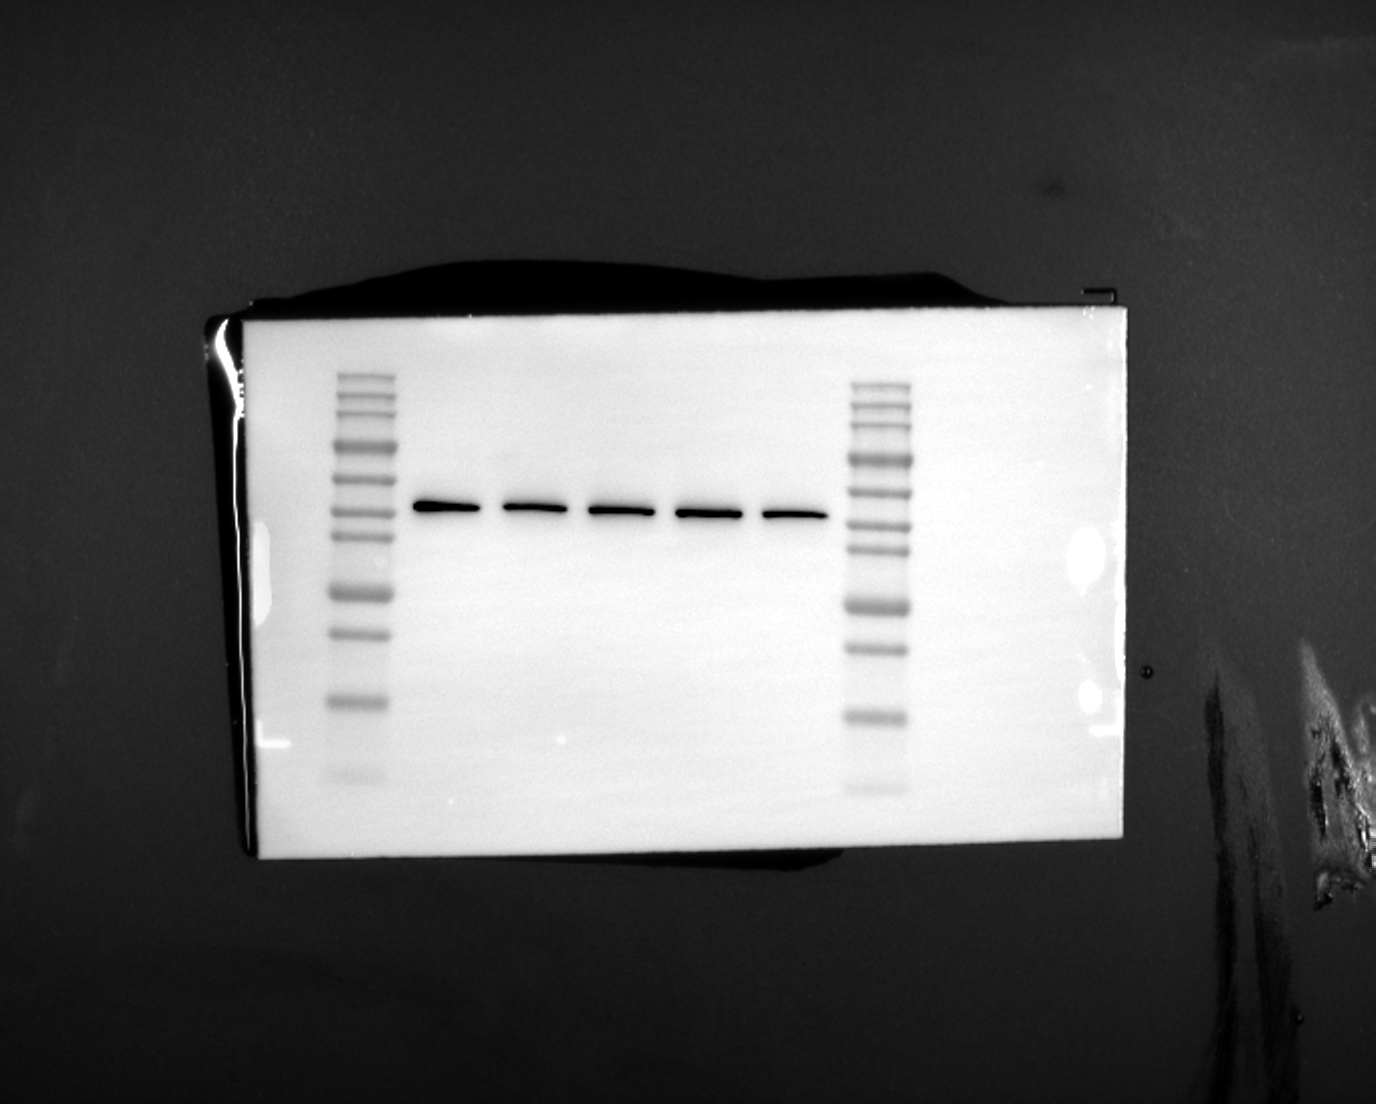

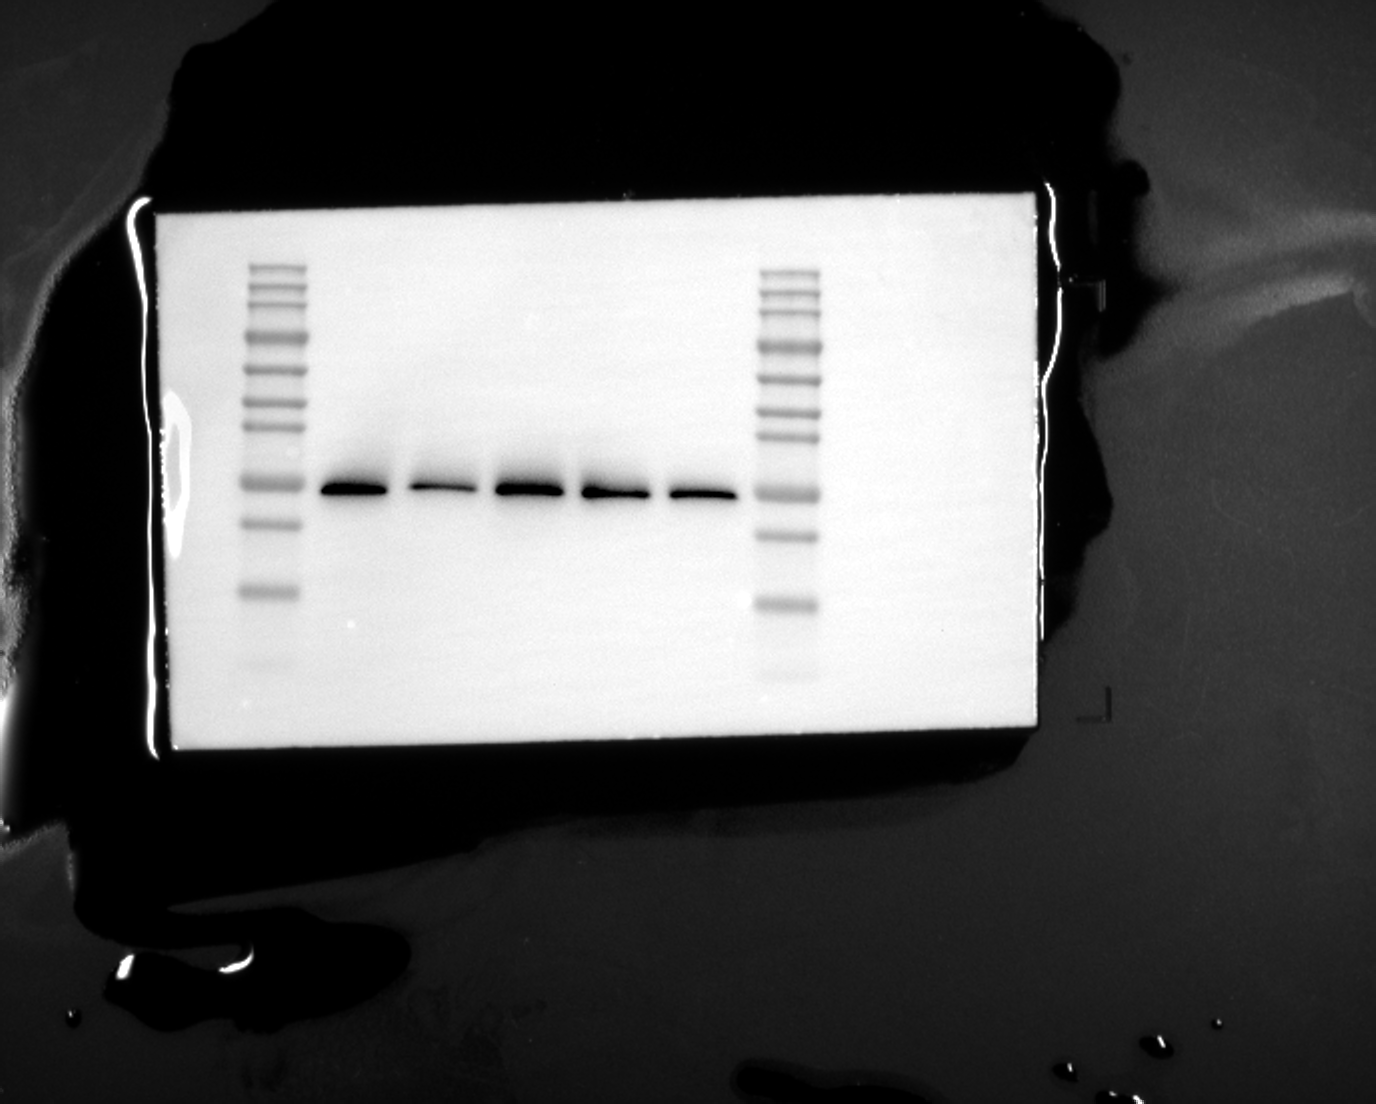


Number 3：

β-actin Bcl-2


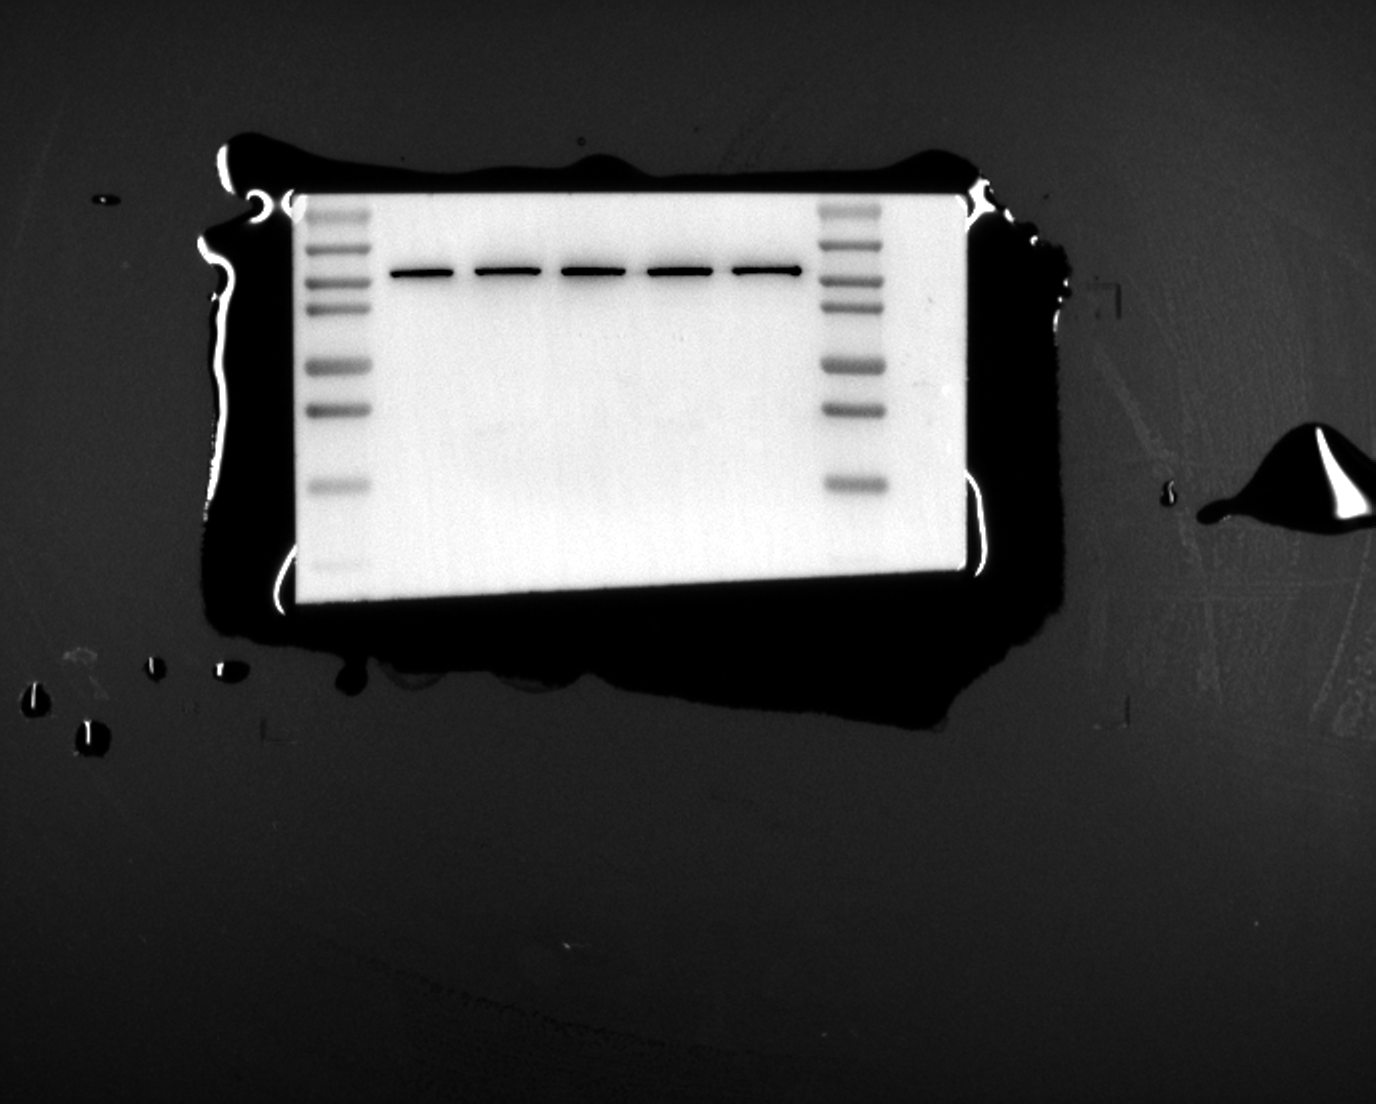

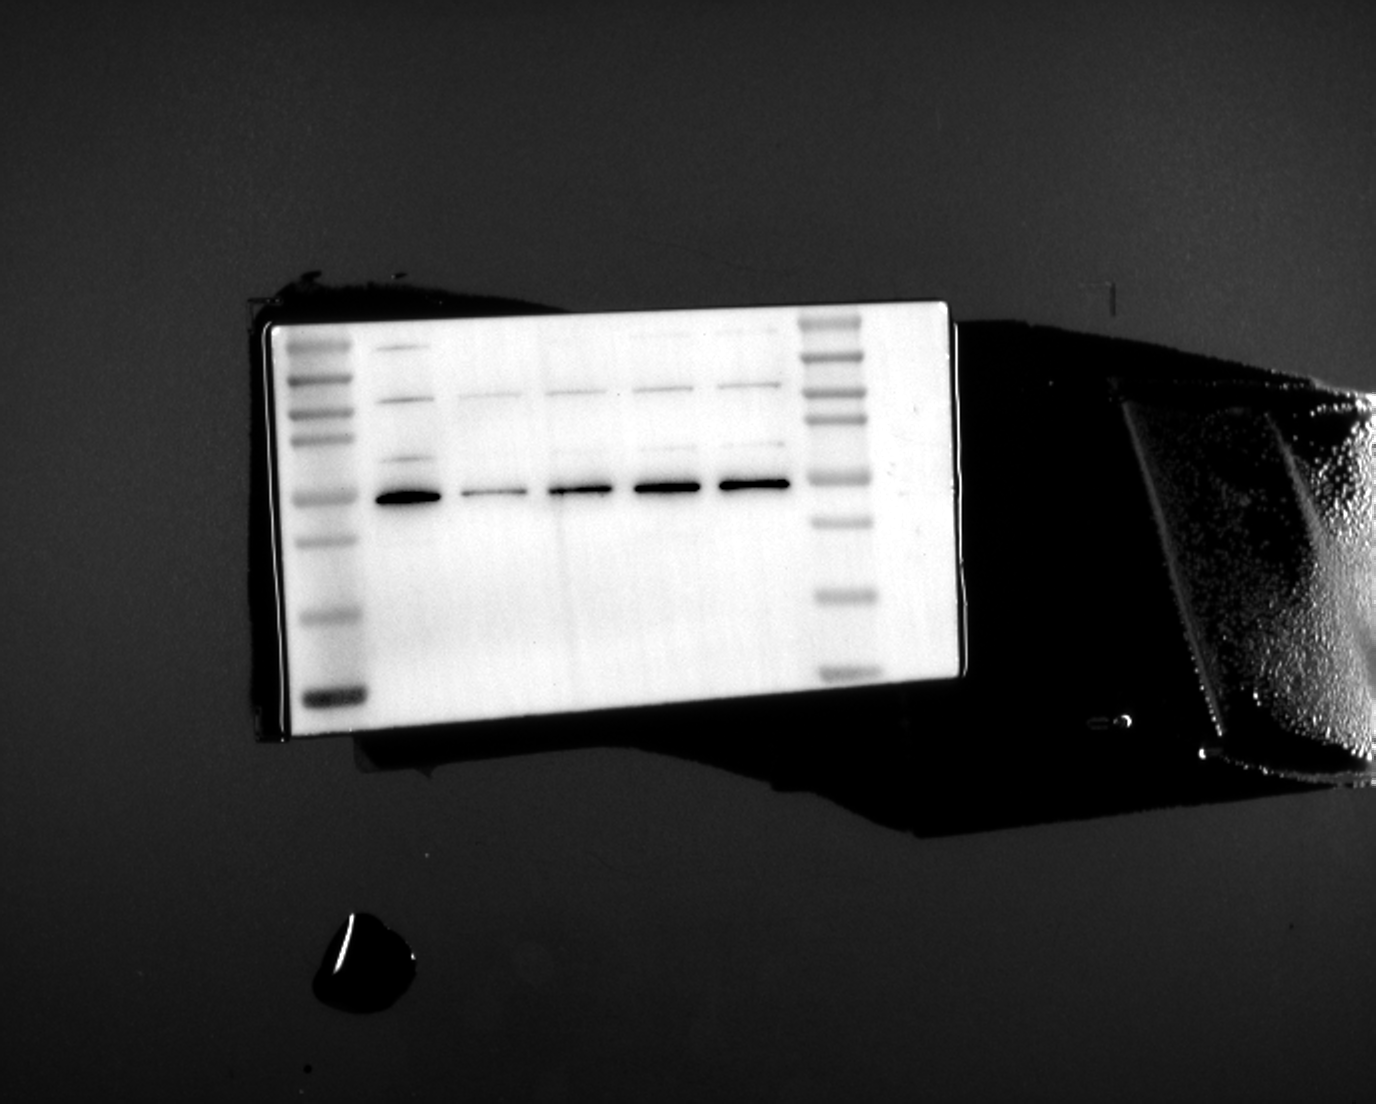

Supplement: Supplementary file 1 [file fb2a7e350b04e72a7c2c1f04.docx]
